# Supplementary material for: African Genomic Medicine Portal: A Web Portal for Biomedical Applications
Source: J Pers Med. 2022 Feb 11;12(2):265. doi: 10.3390/jpm12020265 (PMC8879570; doi:10.3390/jpm12020265)
Supplement: Supplementary file 1 [file jpm-12-00265-s001.zip › jpm-1534466-supplementary.pdf]

# Supplementary Materials for: African Genomic Medicine Portal: A Web Portal for Biomedical Applications

## Supplementary Materials File S1

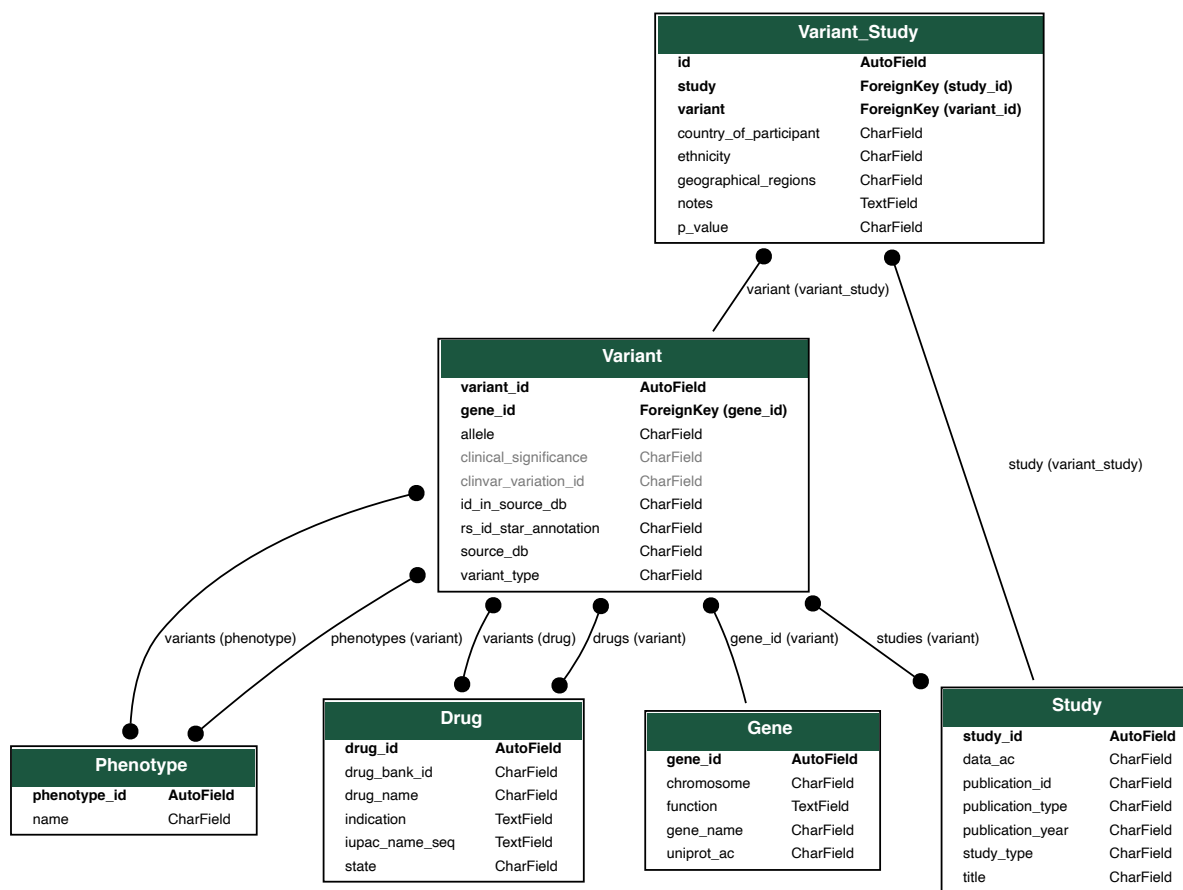

Figure S1: Entity Relationship Model for the AGMP.

## Supplementary Materials File S2

Description of the attributes in the AGMP database.

Table S1: Description of the attributes in the AGMP database.

| Table         | Attribute              | Description                                                                                                                                                                                                                                                                                                                                  |
|---------------|------------------------|----------------------------------------------------------------------------------------------------------------------------------------------------------------------------------------------------------------------------------------------------------------------------------------------------------------------------------------------|
| Variant_Study | Variant                | Refers to the RS identifier in dbSNP or the star allele nomenclature                                                                                                                                                                                                                                                                         |
|               | Country of participant | Is the country or countries from which the participants in a study were recruited. In the case where the country is not available, annotating with a broader geographical region can be made (e.g. Sub-Saharan Africa).                                                                                                                      |
|               | Ethnicity              | Ethnicity reported by the authors of the study                                                                                                                                                                                                                                                                                               |
|               | Geographical region    | Refers to the geographical origin of the individuals in the study only with African ancestry. The regions cover North, East, West, South Africa and the African-American and Afro-Caribbean individuals. For studies that do not provide the country from which the cohort was collected, general terms are used such as Sub-Saharan Africa. |
|               | P-value                | The p-value is reported for the population specified in the Geographical region field. If multiple p-values are calculated for different populations in the same study, only those for populations of African Ancestry are reported.                                                                                                         |
|               | Notes                  | Includes other information mentioned in the associated reference such as the size of the cohort or the disambiguation.                                                                                                                                                                                                                       |
| Variant       | Gene ID                | Corresponds to the gene symbol                                                                                                                                                                                                                                                                                                               |
|               | Allele                 | The allele responsible for the observed phenotype. 9                                                                                                                                                                                                                                                                                         |
|               | Clinical significance  | Reports the clinical impact annotated in the ClinVar database of the allele causing or associated with the phenotype                                                                                                                                                                                                                         |
|               | Clinvar variation id   | Is the ClinVar accession for annotation of the allele causing or associated with the phenotype                                                                                                                                                                                                                                               |
|               | ID in source database  | Is the accession ID in PharmGKB or DisGeNET                                                                                                                                                                                                                                                                                                  |
|               | Source database        | PharmGKB or DisGeNET                                                                                                                                                                                                                                                                                                                         |
| Phenotype     | Variant type           | Can be either a SNV or a star allele variant                                                                                                                                                                                                                                                                                                 |
|               | Phenotype name         | Refers to the effect on the drug-response or the disease                                                                                                                                                                                                                                                                                     |
| Gene          | Chromosome             | Chromosome location of the variant                                                                                                                                                                                                                                                                                                           |
|               | Function               | Describes the biological function for the corresponding gene retrieved from the UniProt database                                                                                                                                                                                                                                             |
|               | UniProt                | Corresponds to the UniProt accession of the protein encoded by the annotated gene                                                                                                                                                                                                                                                            |
|               | gene_name              | Gene symbol according to the Human Genome Organisation                                                                                                                                                                                                                                                                                       |
| Drug          | DRUGBANK ID            | Is the identifier of the drug in the DRUGBANK database                                                                                                                                                                                                                                                                                       |
|               | Indication             | Refers to the use of drug for the treatment of a particular disease                                                                                                                                                                                                                                                                          |
|               | IUPAC name             | Is the chemical nomenclature of the drug according to IUPAC standards                                                                                                                                                                                                                                                                        |
|               | State                  | Indicates the availability of the drug as a treatment.                                                                                                                                                                                                                                                                                       |
| Study         | Date of access         | Date of access to the paper source that describes the variant.                                                                                                                                                                                                                                                                               |
|               | Publication type       | Refers to the repository that indexes the paper source (e.g. PubMed)                                                                                                                                                                                                                                                                         |
|               | Publication year       | Date of publication for the source paper                                                                                                                                                                                                                                                                                                     |
|               | Type                   | Type of the study could be: Association, GWAS, Genetic variability study, functional analysis or linkage.                                                                                                                                                                                                                                    |
|               | Title                  | Title of the source paper                                                                                                                                                                                                                                                                                                                    |

## Supplementary Materials File S3

African Genomic Medicine Portal Tutorial (Next page)

# African Genomic Medicine Portal

## Tutorial

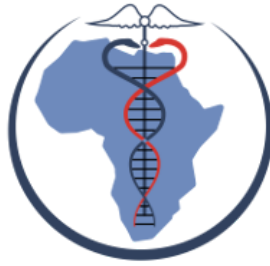

## Introduction

The African Genomic Medicine Portal (AGMP) functions as a curated resource for researchers around the world who are conducting genomics research on African and African- ancestry populations. The portal may also be useful for individuals working in the health sector, such as healthcare workers, pharmacists, and policymakers, though it was designed as a research tool and should not be used for clinical decisions. The portal functions as a gateway to data relevant for African genomic medicine research, including pharmacogenomics and clinical/disease research, accessing and providing African-specific data from existing resources in an easily accessible manner.

AGMP retrieves and curates data from various resources. The current release contains data retrieved and curated from PharmGKB and DisGeNET.

This tutorial provides a step by step guide to searching data in the Portal.

## Search:

1. Access AGMP using the following link: <https://agmp.h3abionet.org/>. On this page, **four main data categories** will be displayed: **Disease**, **Drug**, **Variant**, and **Gene**, as illustrated in **Figure 1**.

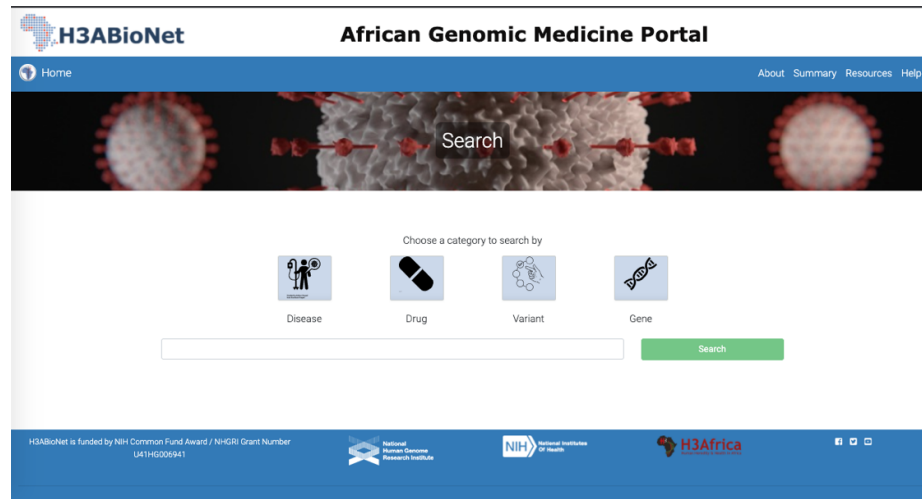

**Figure 1.** AGMP search page.

2. A user may search based on their preferred data category by selecting the *corresponding data category logo* (Disease, Drug, Variant, or Gene), as illustrated in **Figure 2A-D**. **Results are customized according to the data category selected.**

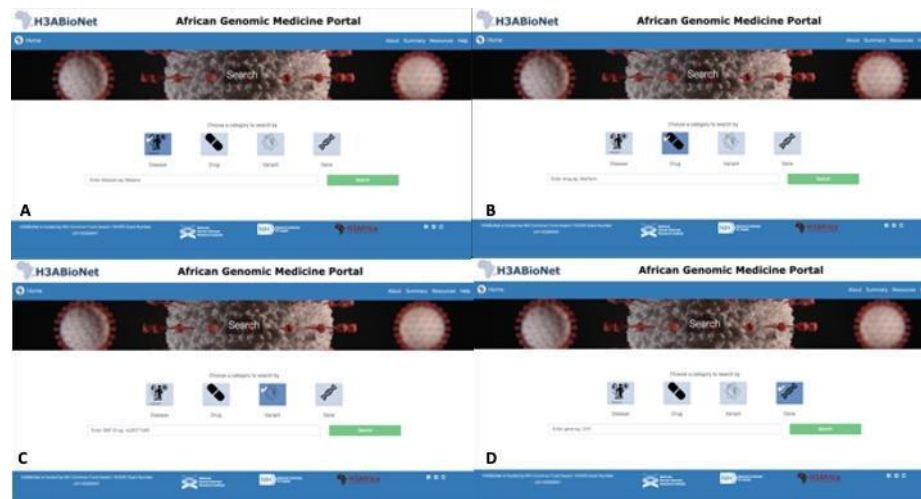

**Figure 2.** (A) Disease category selected; (B) Drug category selected; (C) Variant category selected; (D) Gene category selected.

3. Enter a search term into the search box and select **Search**. Matching results will appear below the text box, as illustrated in **Figure 3A-D**.

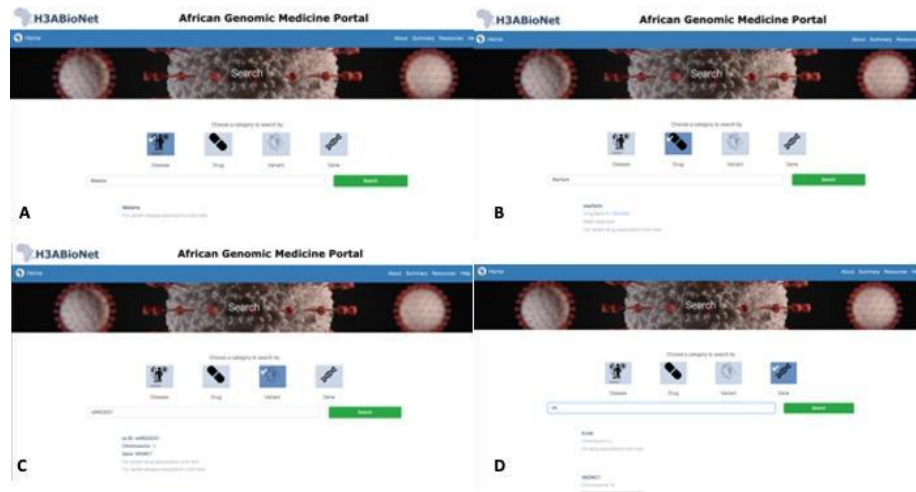

**Figure 3.** (A) Disease result; (B) Drug result; (C) Variant result; (D) Gene result.

## Results:

*NB: Results are discussed by the data search category selected during Search.*

### 1. Disease Results:

- 1.1. When searching by a disease, a list of relevant results appears below the search box. To proceed to complete results, select the “For variant-disease associations click here” button, as illustrated in **Figure 3A**.
- 1.2. As illustrated in **Figure 4**, the results page will contain a list of variant-disease associations. Table contents are described in **Table 1**.

Variant Disease associations

Copy CSV Excel Print Search:

| Variant    | Disease | Gene                       | Significance | Country                   | Studies                                                                                                                                                                                                                 |
|------------|---------|----------------------------|--------------|---------------------------|-------------------------------------------------------------------------------------------------------------------------------------------------------------------------------------------------------------------------|
| rs10192428 | Malaria | <a href="#">SPN1A3</a>     | 0.00000051   | The Gambia                | Genome-wide and fine-resolution association analysis of malaria in West Africa                                                                                                                                          |
| rs1046089  | Malaria | <a href="#">PRICK4</a>     | < 0.0001     | The Gambia                | A genetic association study in the Gambia using tagging polymorphisms in the major histocompatibility complex class III region implicates a HLA-B associated transcript 2 polymorphism in severe malaria susceptibility |
| rs10900585 | Malaria | <a href="#">ATP2B4</a>     | 0.000000061  | Ghana                     | Genome-wide association study indicates two novel resistance loci for severe malaria                                                                                                                                    |
| rs10900585 | Malaria | <a href="#">ATP2B4</a>     | 0.0052       | Ghana                     | Genome-wide association study indicates two novel resistance loci for severe malaria                                                                                                                                    |
| rs11335470 | Malaria | <a href="#">LINC00944</a>  | 0.0000004    | Tanzania                  | Novel genetic polymorphisms associated with severe malaria and under selective pressure in North-eastern Tanzania                                                                                                       |
| rs11416933 | Malaria | <a href="#">FRS1-OT</a>    | 0.000000562  | Tanzania                  | Novel genetic polymorphisms associated with severe malaria and under selective pressure in North-eastern Tanzania                                                                                                       |
| rs12405994 | Malaria | <a href="#">AC062813.1</a> | 0.000000082  | The Gambia                | Genome-wide and fine-resolution association analysis of malaria in West Africa                                                                                                                                          |
| rs12788102 | Malaria | <a href="#">MMP26</a>      | < 0.001      | The Gambia, Kenya, Malawi | Imputation-based meta-analysis of severe malaria in three African populations                                                                                                                                           |
| rs12788102 | Malaria | <a href="#">DKS1F1</a>     | < 0.001      | The Gambia, Kenya, Malawi | Imputation-based meta-analysis of severe malaria in three African populations                                                                                                                                           |
| rs12789492 | Malaria | <a href="#">MMP26</a>      | < 0.001      | The Gambia, Kenya, Malawi | Imputation-based meta-analysis of severe malaria in three African populations                                                                                                                                           |

**Figure 4.** Tabulated Disease result.

**Table 1.** Descriptions of Disease results column headers.

|                     |                                                                               |
|---------------------|-------------------------------------------------------------------------------|
| <b>Variant</b>      | The genetic variants which have been associated with the disease of interest. |
| <b>Disease</b>      | The disease of interest entered in the search box.                            |
| <b>Gene</b>         | The gene in which the variant is located.                                     |
| <b>Significance</b> | The p-value observed for the association in the given study.                  |
| <b>Country</b>      | The country of origin of the research participants.                           |
| <b>Studies</b>      | The study associated with the result.                                         |

## 2. Drug Results:

- 2.1. When searching by a drug, a list of relevant results appears below the search box. To proceed to complete results, select the “For variant-drug associations click here” button, as illustrated in **Figure 3B**.
- 2.2. As illustrated in **Figure 5**, the results page will contain a list of variant-drug associations. Table contents are described in **Table 2**.

Variant Drug associations

Copy CSV Excel Print Search:

| Variant     | Gene    | Drug     | Significance | Country     | Studies                                                                                                                               |
|-------------|---------|----------|--------------|-------------|---------------------------------------------------------------------------------------------------------------------------------------|
| rs1057910   | CYP2C9  | warfarin | < 0.001      | USA         | Genetic and clinical predictors of warfarin dose requirements in African Americans.                                                   |
| rs1057910   | CYP2C9  | warfarin | 0.0004       | Egypt       | Genetic and nongenetic factors associated with warfarin dose requirements in Egyptian patients.                                       |
| rs12714145  | GGCX    | warfarin | 0.24         | Egypt       | Impact of GGIX, STX1B and FPGS Polymorphisms on Warfarin Dose Requirements in European-Americans and Egyptians.                       |
| rs12777823  | CYP2C18 | warfarin | ambiguous    | USA         | Influence of common and rare genetic variation on warfarin dose among African-Americans and European-Americans using the exome array. |
| rs17860867  | VKORC1  | warfarin | 0.119        | USA         | Genetic and clinical predictors of warfarin dose requirements in African Americans.                                                   |
| rs1799853   | CYP2C9  | warfarin | < 0.001      | USA         | Genetic and clinical predictors of warfarin dose requirements in African Americans.                                                   |
| rs1799853   | CYP2C9  | warfarin | 0.0004       | Egypt       | Genetic and nongenetic factors associated with warfarin dose requirements in Egyptian patients.                                       |
| rs202201137 | CYP2C9  | warfarin |              | Puerto Rico | CYP2C9*1, a rare missense variant identified in a Puerto Rican patient with low warfarin dose requirements.                           |
| rs2108622   | CYP4F2  | warfarin |              | USA         | Genetic and clinical predictors of warfarin dose requirements in African Americans.                                                   |
| rs2108622   | CYP4F2  | warfarin | 0.31         | Egypt       | Genetic and nongenetic factors associated with warfarin dose requirements in Egyptian patients.                                       |

Showing 1 to 10 of 49 entries Previous 1 2 3 4 5 Next

**Figure 5.** Tabulated Drug result.

**Table 2.** Descriptions of Drug results column headers.

|                     |                                                                            |
|---------------------|----------------------------------------------------------------------------|
| <b>Variant</b>      | The genetic variants which have been associated with the drug of interest. |
| <b>Drug</b>         | The drug of interest entered in the search box.                            |
| <b>Gene</b>         | The gene in which the variant is located.                                  |
| <b>Significance</b> | The p-value observed for the association in the given study.               |
| <b>Country</b>      | The country of origin of the research participants.                        |
| <b>Studies</b>      | The study associated with the result.                                      |

### 3. Variant Results:

- 3.1. When searching by a variant, a list of relevant results appears below the search box. To proceed to complete results, select either the “For variant-disease associations click here” or the “For variant-drug associations click here” button, as illustrated in **Figure 3C**.
- 3.2. Based on the selected button, the results page will contain a list of either variant-disease or variant-drug associations, as illustrated in **Figures 4 and 5**. Table contents are described in **Table 3**.

**Table 3.** Descriptions of Variant results column headers.

|                     |                                                              |
|---------------------|--------------------------------------------------------------|
| <b>rsID</b>         | The genetic variant of interest entered in the search box.   |
| <b>Disease</b>      | The diseases associated with the variant of interest.        |
| <b>Drug</b>         | The drugs associated with the variant of interest.           |
| <b>Gene</b>         | The gene in which the variant of interest is located.        |
| <b>Significance</b> | The p-value observed for the association in the given study. |
| <b>Country</b>      | The country of origin of the research participants.          |
| <b>Studies</b>      | The study associated with the result.                        |

### 4. Gene Results:

- 4.1. When searching by a gene, a list of relevant results appears below the search box. To proceed to complete results, select the “For gene associations click here”, as illustrated in **Figure 3D**.
- 4.2. As illustrated in **Figure 6A-B**, the results page will contain a description section (**6A**), a Pharmacogenomics Associations section (**6A**) and a Disease Associations section (**6B**). Table contents are described in **Table 4**.

## COMT

Gene Name: COMT

UniProt ID: P21564

Function: Catalyzes the O-methylation, and thereby the inactivation, of catecholamine neurotransmitters and catechol hormones. Also converts the biological half-lives of certain neuroactive drugs like L-DOPA, a pro-drug of DOPA, and isoproterenol.

### Pharmacogenomics Associations

#### SNPs

| Copy     | CSV      | Excel     | Print                                                                                                 | Search  |          |                                  |         |  |
|----------|----------|-----------|-------------------------------------------------------------------------------------------------------|---------|----------|----------------------------------|---------|--|
| rs ID    | Genotype | Drug      | Description                                                                                           | P-value | Study    | Regions                          | Country |  |
| rs4980   | G        | morphine  | Allele G is not associated with dose of morphine in people with Pain as compared to allele A.         | 0.2529  | 20259945 | North Africa                     | Tunisia |  |
| rs737935 | AA       | buspirone | Genotype AA is associated with increased response to buspirone in anxiety as compared to genotype GG. | 0.05    | 18976302 | African American/White Caribbean | USA     |  |

Showing 1 to 2 of 2 entries

Previous Next

### Disease Associations

| Copy      | CSV           | Excel   | Print    | Search       |                         |  |  |  |
|-----------|---------------|---------|----------|--------------|-------------------------|--|--|--|
| rs ID     | Disease       | P-value | Study    | Regions      | Country of Participants |  |  |  |
| rs5251    | Schizophrenia | <0.05   | 29721161 | North Africa | Egypt                   |  |  |  |
| rs7365405 | Schizophrenia | 0.038   | 22321161 | North Africa | Egypt                   |  |  |  |

Showing 1 to 2 of 2 entries

Previous Next

**Figure 6.** Gene result page.

**Table 4.** Descriptions of Gene results column headers.

|                                |                                                                                         |
|--------------------------------|-----------------------------------------------------------------------------------------|
| <b>Variant</b>                 | The genetic variants located in the gene which have been studied in African populations |
| <b>Genotype</b>                | The genotype of a genetic variant associated with a given drug association.             |
| <b>Drug</b>                    | The drug associated with genetic variant.                                               |
| <b>Description</b>             | A description of the drug association.                                                  |
| <b>P-value</b>                 | The p-value observed for a given association.                                           |
| <b>Study</b>                   | The PMID associated with the associated study.                                          |
| <b>Regions</b>                 | The region(s) from which the research participants originate.                           |
| <b>Country of Participants</b> | The Country(ies) from which the research participants originate.                        |
| <b>Disease</b>                 | The disease associated with the genetic variant.                                        |

- 4.3. Using the task bars found in each table, the user can access different information on either the disease, drug, variant or gene. Table 1 provides an overview of the different types of information found.

## Other Resources

1. When clicking on the **Summary** tab, a summary of the Total Number of Genes, Drugs, Diseases and Variants, included in the portal, is provided. The locations from where the data is derived are also illustrated in a user-friendly map.

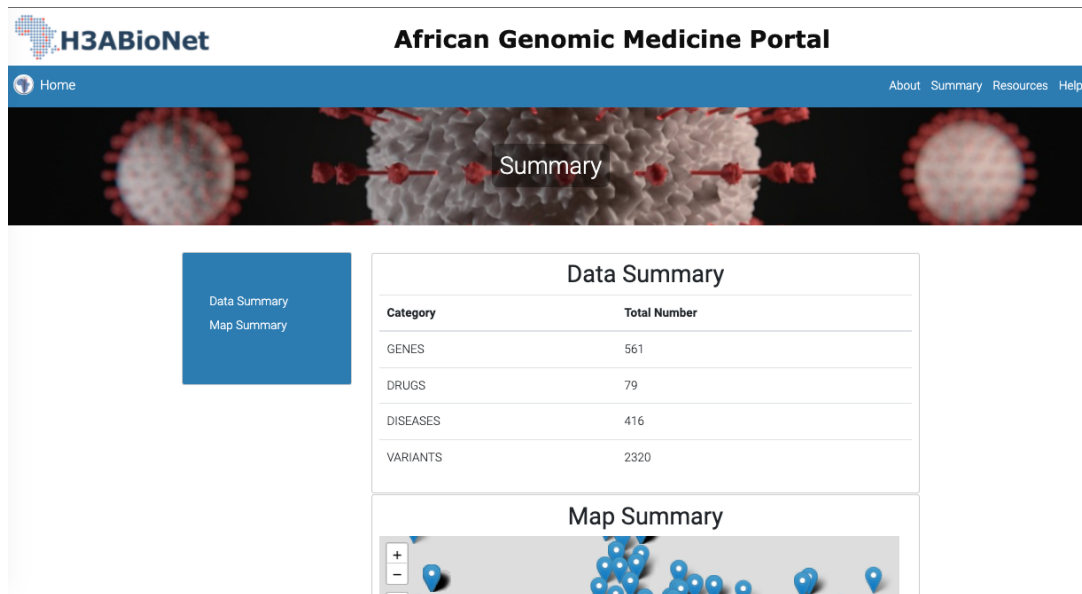

**Figure 4:** Summary tab.

2. When clicking on the Resources tab, a list of additional H3ABioNet and relevant external resources are provided, these include: Databases; Tools & Pipelines; and Online Courses.

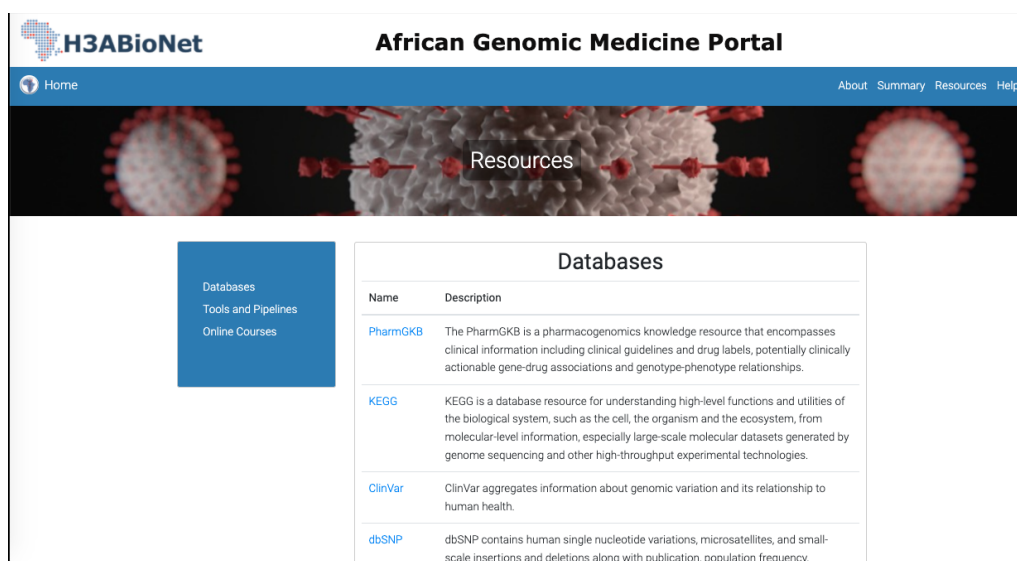

**Figure 5:** Resources tab.
